# Supplementary material for: Drosophila melanogaster behaviour changes in different social environments based on group size and density
Source: PubMed Central journal article supplement (PMC7293324; doi:10.1038/s42003-020-1024-z), 2020-06-12
Supplement: 42003_2020_1024_MOESM4_ESM.pdf [file 42003_2020_1024_MOESM4_ESM.pdf]

## **Description of Additional Supplementary Files**

**File Name:** **Supplementary Data 1**

**Description:** Trial Data for Social Behaviour Measurements and Interaction Criteria
